# Supplementary material for: A highly efficient rare earth metal oxide nanorods based platform for aflatoxin detection
Source: Royal Society of Chemistry journal article supplement (doi:10.1039/c3tb20690d), 2013-01-01

## Supporting Information

### Highly efficient rare earth metal oxide nanorods based platform for aflatoxin detection

Jay Singh<sup>1</sup>, Appan Roychoudhury<sup>2,4</sup>, Manish Srivastava<sup>3</sup>, Pratima R. Solanki<sup>4</sup>, Dong Won Lee<sup>1</sup>, Seung Hee Lee<sup>\*1</sup> and B. D. Malhotra<sup>\*2,4</sup>

<sup>1</sup>*Department of BIN Fusion Technology and Department of Polymer-Nano Science and Technology, Chonbuk National University, Jeonju, Jeonbuk 561-756, Korea*

<sup>2</sup>*Department of Biotechnology, Delhi Technological University, Shahbad Daultapur, Main Bawana Road, Delhi 110042, India*

<sup>3</sup>*Department of Physics, Motilal Nehru National Institute of Technology, Allahabad, Allahabad 211004, India*

<sup>4</sup>*Department of Science & Technology Centre on Biomolecular Electronics, Biomedical Instrumentation Section, Material Physics and Engineering Division, CSIR-National Physical Laboratory, Dr. K. S. Krishnan Marg, New Delhi 110012, India*

*\*Corresponding author. Email: Seung Hee Lee ([lshl@jbnu.ac.kr](mailto:lshl@jbnu.ac.kr)) Tel.: +82-063-270-2343; Fax: +82-63-270-2341*

*\*Corresponding author. Email: B. D. Malhotra ([bansi.malhotra@gmail.com](mailto:bansi.malhotra@gmail.com)) Tel.: +91-11-27294668; Fax: 91-11-27871023*

**Fig [S1]** Effect of amount of Ab-AFB<sub>1</sub> on the amperometric response of BSA/Ab-AFB<sub>1</sub>/n-Sm<sub>2</sub>O<sub>3</sub>/ITO immunoelectrode in PBS (50 mM, pH 6.0, 0.9% NaCl) containing [Fe(CN)<sub>6</sub>]<sup>3-/4-</sup> (5 mM) at 20 mV/s scan rate using CV technique.

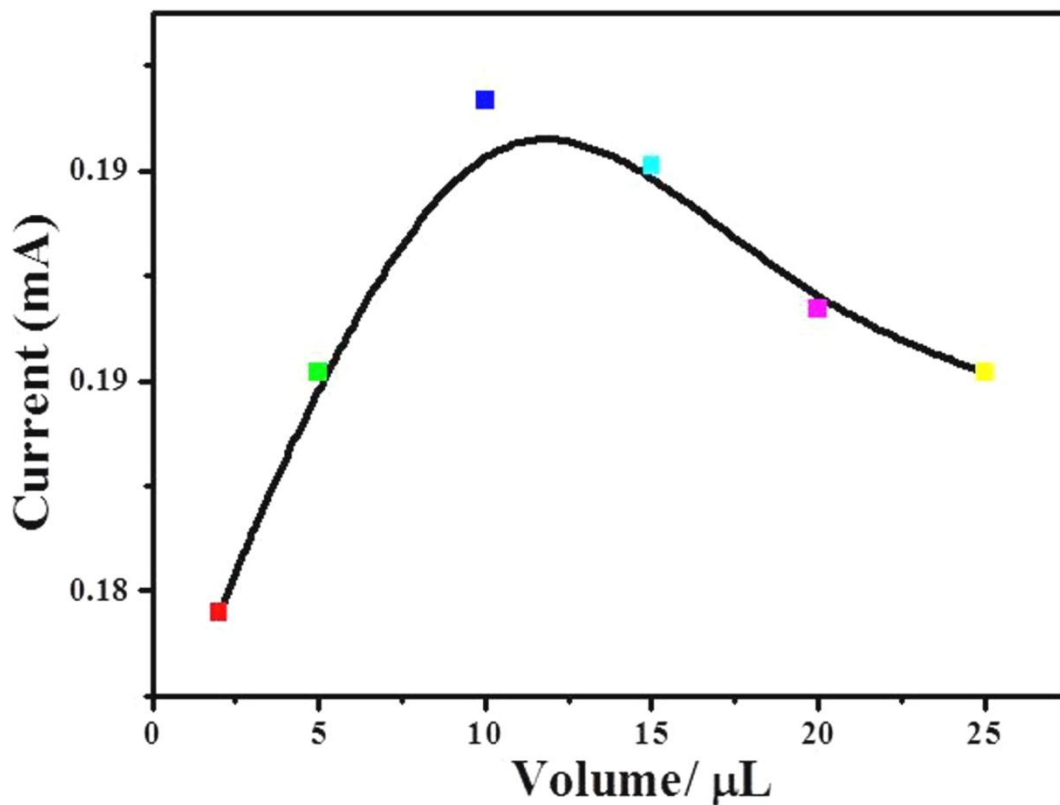

**Fig [S2]** Effect of amount of BSA on the amperometric response of BSA/Ab-AFB<sub>1</sub>/n-Sm<sub>2</sub>O<sub>3</sub>/ITO immunoelectrode in PBS (50 mM, pH 6.0, 0.9% NaCl) containing [Fe(CN)<sub>6</sub>]<sup>3-/4-</sup> (5 mM) at 20 mV/s scan rate using CV technique.

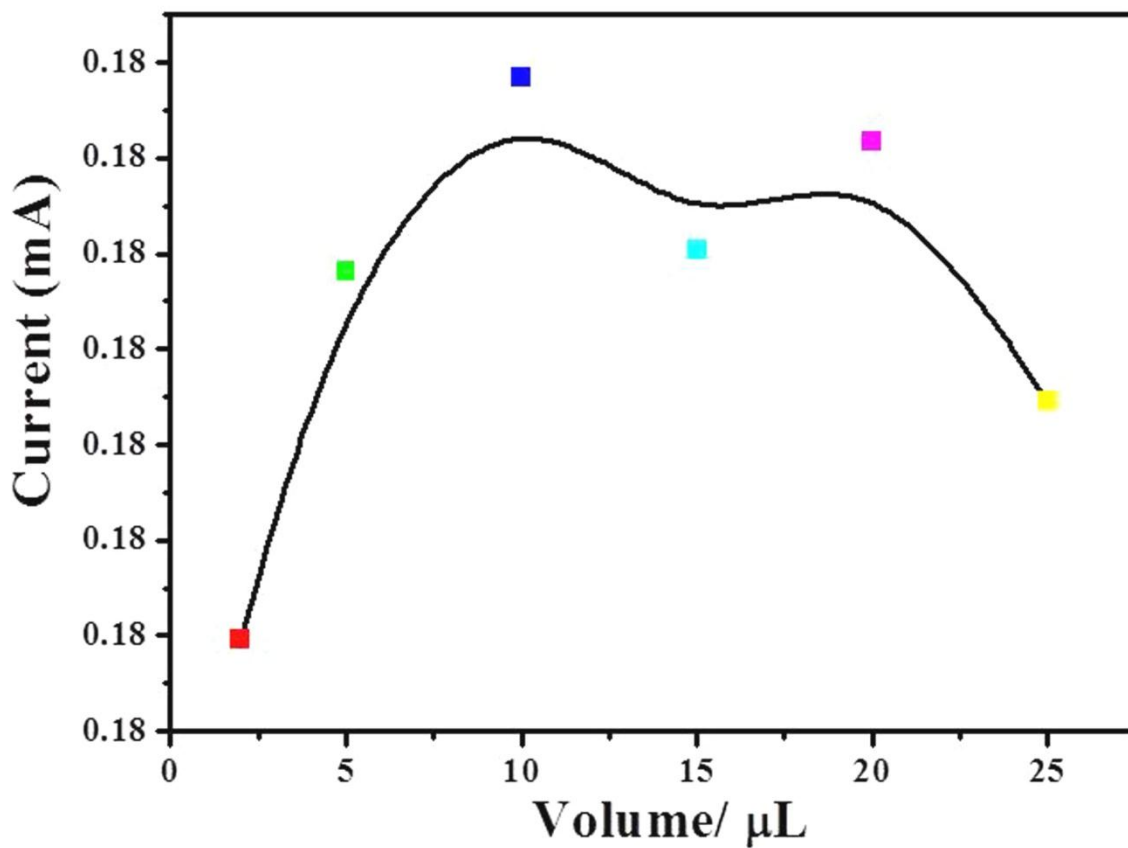

**Fig [S3]** Magnitude of potential difference as function of scan rate (10–100 mV/s).

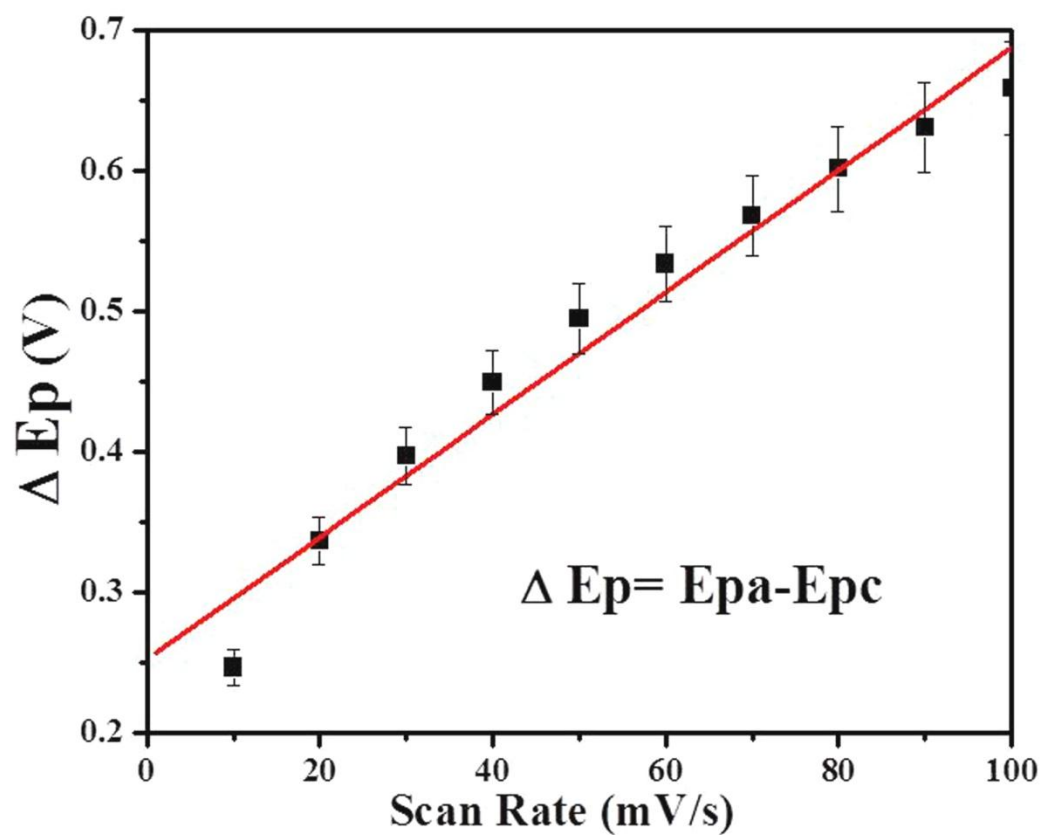

**Fig [S4]** Interferences studies of BSA/Ab-AFB<sub>1</sub>/n-Sm<sub>2</sub>O<sub>3</sub>/ITO immunoelectrode in presence of ochratoxin-A.

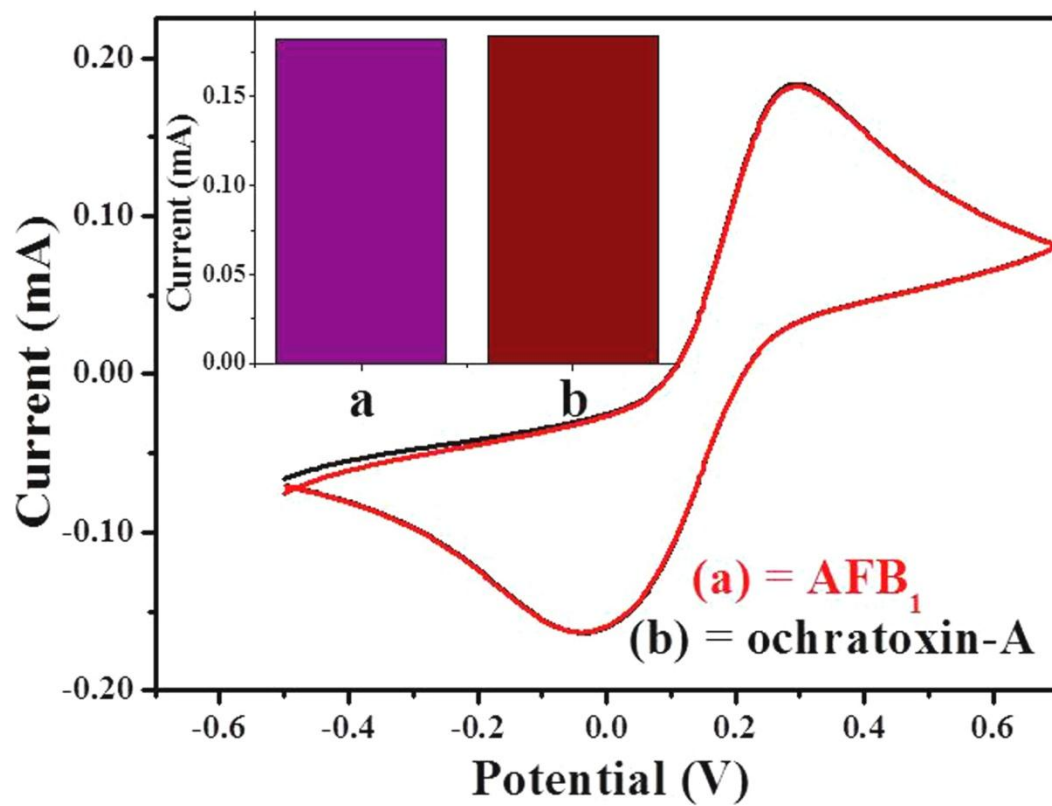

Supplement: c3tb20690d.pdf [file c3tb20690d.pdf]
